# Supplementary material for: Photo-Cleavable Polycations-Wrapped Upconversion Nanoparticles for Efficient siRNA Delivery and Cancer Therapy
Source: MDPI journal article supplement (doi:10.3390/targets1010006), 2023-09-12
Supplement: s1 [file s1]

# Photo-Cleavable Polycations Wrapped Upconversion Nanoparticles for Efficient siRNA Delivery and Cancer Therapy

Yuling He <sup>1,2\*</sup>, Shuwen Guo <sup>3</sup>, Huangxian Ju <sup>2</sup> and Ying Liu <sup>2\*</sup>

<sup>1</sup>Shaanxi Key Laboratory of Brain Disorders, Institute of Basic and Translational Medicine, Xi'an Medical University, No. 1 Xinwang Road, Xi'an 710021, China. E-mail: heyuling0925@163.com

<sup>2</sup>State Key Laboratory of Analytical Chemistry for Life Science, School of Chemistry and Chemical Engineering, Nanjing University, Nanjing 210023, China. E-mail: yingliu@n ju.edu.cn

<sup>3</sup>Key Laboratory of Analytical Chemistry for Life Science of Shaanxi Province, School of Chemistry and Chemical Engineering, Shaanxi Normal University, Xi'an 710100, China.

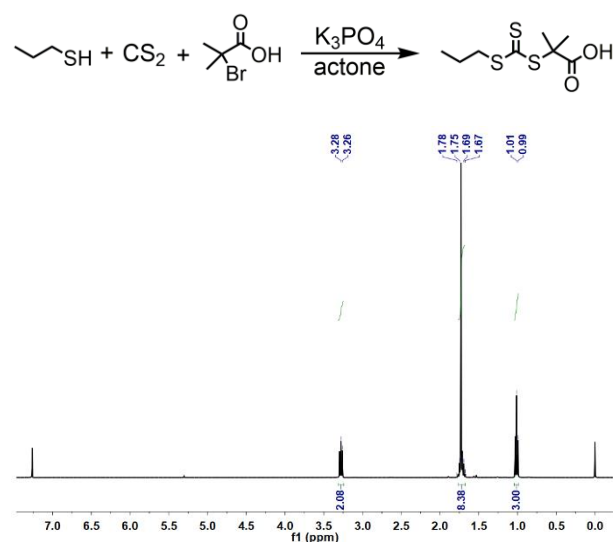

Figure S1. Synthetic route and <sup>1</sup>H NMR spectrum (in CDCl<sub>3</sub>) of chain transfer agent CTA.

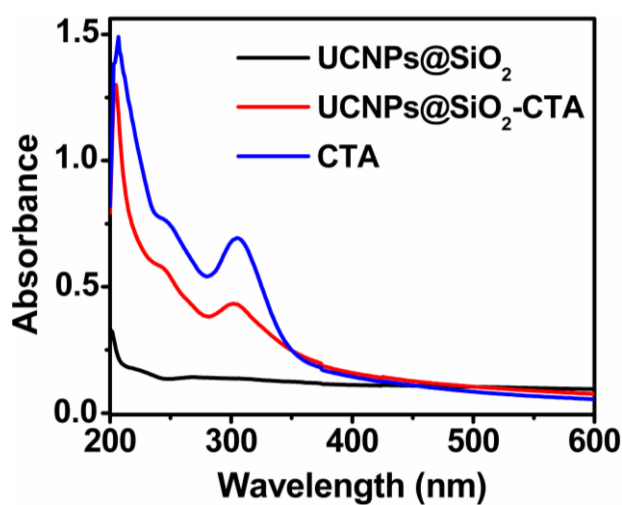

Figure S2. UV-Vis spectra of UCNPs@SiO<sub>2</sub>, UCNPs@SiO<sub>2</sub>-CTA and CTA.

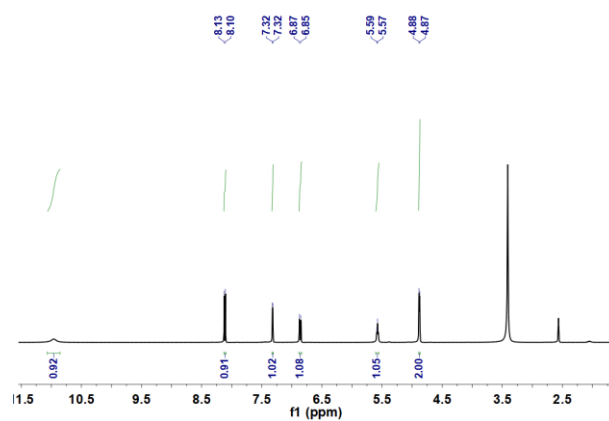

**Figure S3.** Synthetic route and <sup>1</sup>H NMR spectrum (in DMSO-*d*<sub>6</sub>) of 5-hydroxy-2-nitrobenzyl alcohol (Compound 1).

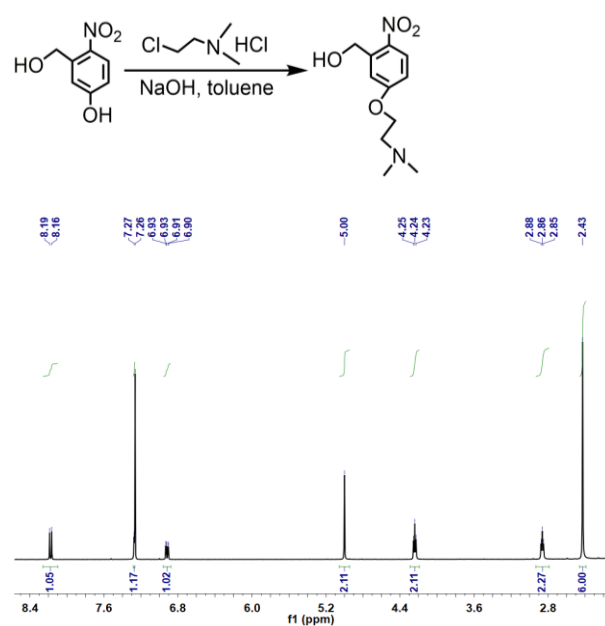

**Figure S4.** Synthetic route and <sup>1</sup>H NMR spectrum (in CDCl<sub>3</sub>) of 5-(2-(dimethylamino)ethoxy)-2-nitrobenzyl alcohol (Compound 2).

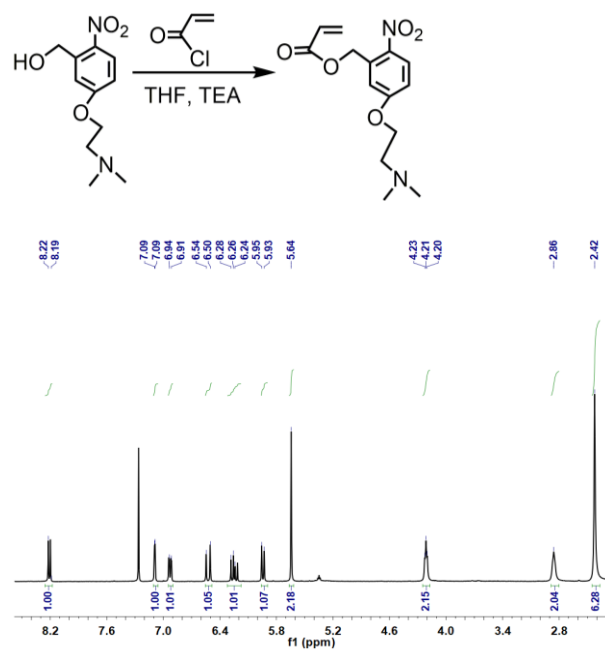

**Figure S5.** Synthetic route and  $^1\text{H}$  NMR spectrum (in  $\text{CDCl}_3$ ) of 5-(2-(dimethylamino)ethoxy)-2-nitrobenzyl acrylate (DMNA).

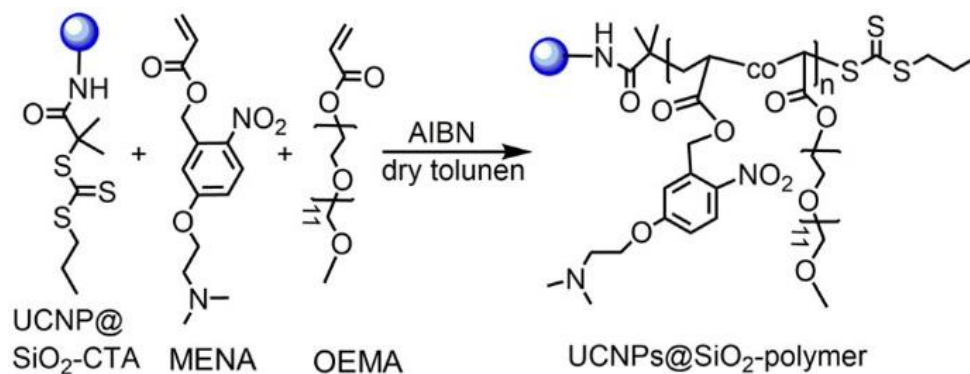

**Figure S6.** Synthetic route of UCNP@SiO<sub>2</sub>-polymer via RAFT polymerization.

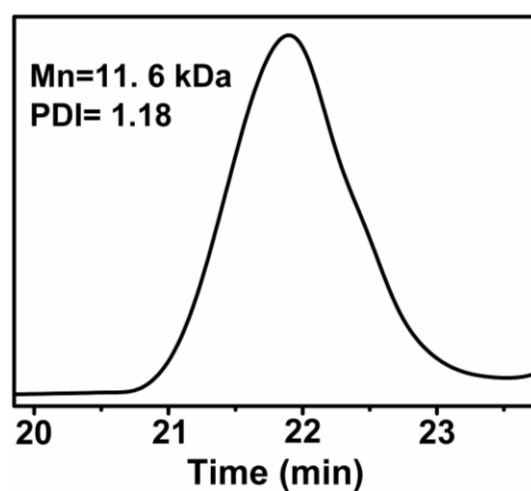

**Figure S7.** Gel permeation chromatographic (GPC) analysis of P(OEOA-co-DMNA) from the surface of UCNP@SiO<sub>2</sub>-polymer using THF as eluent.

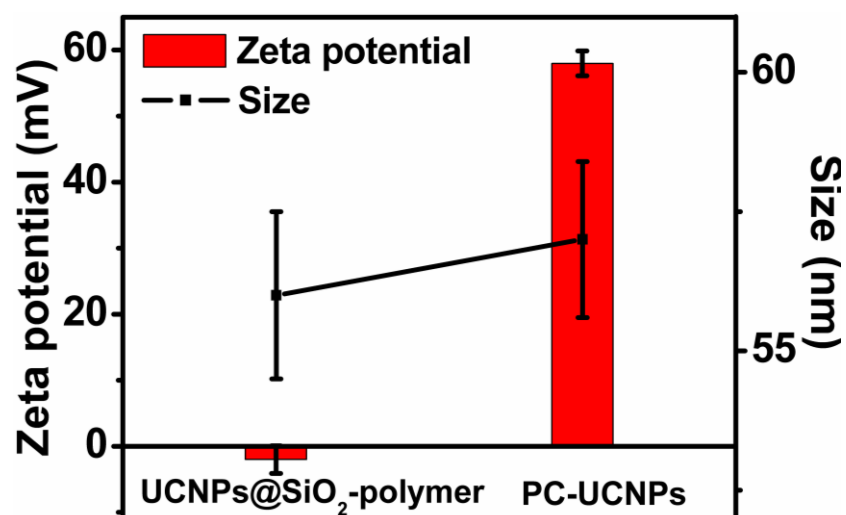

**Figure S8.** Zeta potential and DLS analysis of UCNP@SiO<sub>2</sub>-polymer and PC-UCNPs.

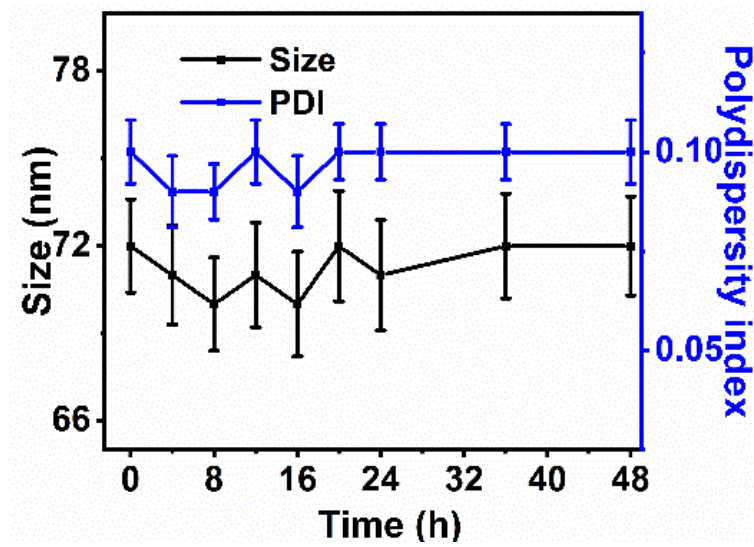

**Figure S9.** DLS analysis and polydispersity index (PDI) of PC-UCNPs/siRNA/HA incubated with DMEM containing 10% fetal bovine serum for different times.

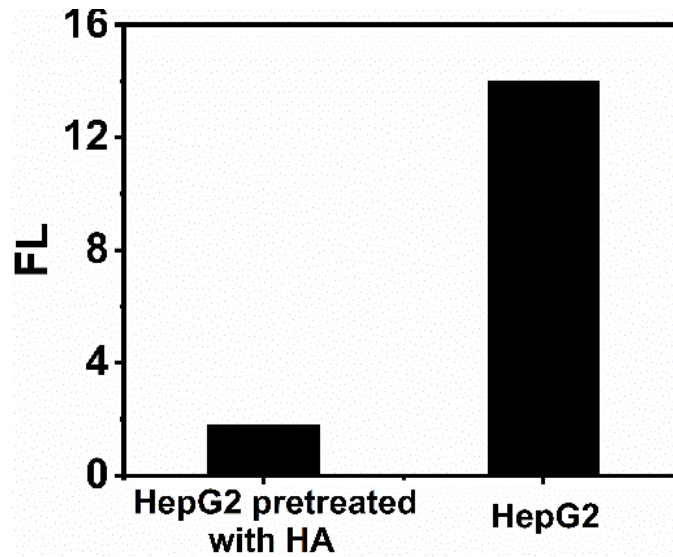

**Figure S10.** Semiquantitative analysis of intracellular FAM fluorescence intensity for PC-UCNPs/siRNA/HA incubated HepG2 cells and HA pre-treated HepG2 cells.

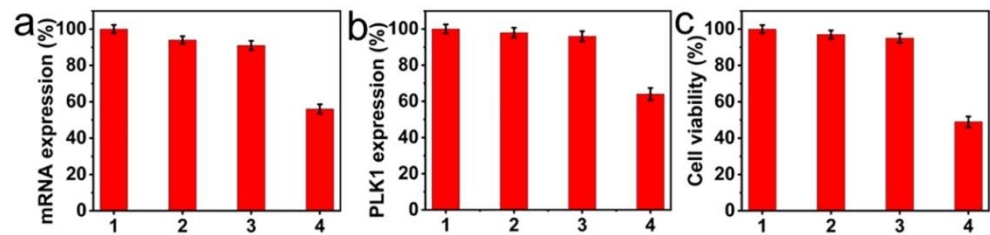

**Figure S11.** Gene silencing and cell viability. Expression levels of (a) PLK1 mRNA expression via qRT-PCR, (b) PLK1 protein expression via ELISA and (c) relative HeLa cell viability via MTT. (1) Untreated HeLa cells, (2) PC-UCNPs/siPLK1/HA treated HeLa cells without NIR irradiation, (3) PC-UCNPs/siRNA/HA treated HeLa cells with NIR irradiation, (4) PC-UCNPs/siPLK1/HA treated HeLa cells with NIR irradiation. The error bars indicate means  $\pm$  S.D. (n = 5).

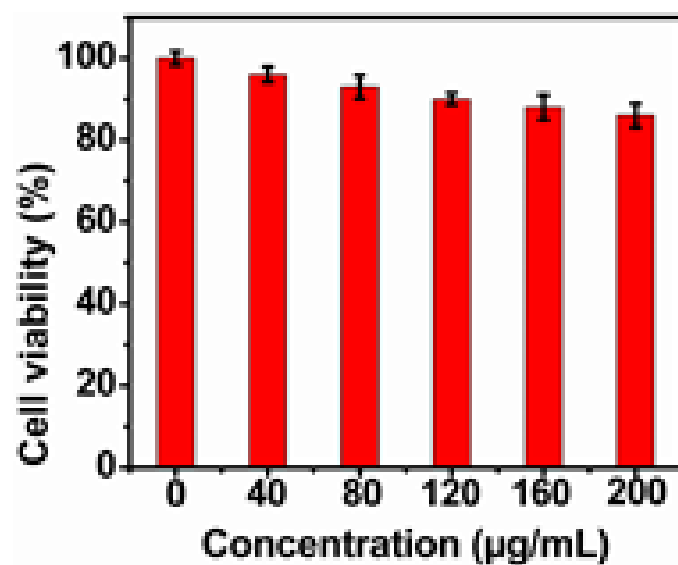

Fig. S12 Relative cell viabilities of HepG2 cells treated with PC-UCNPs/siRNA/HA at the series concentrations.

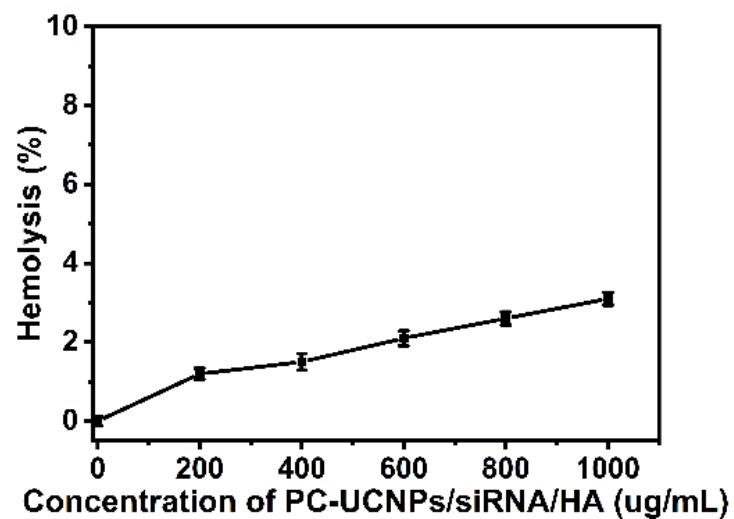

Figure S13. Hemolysis percentages of red blood cells (RBCs) incubated with 0, 200, 400, 600, 800, 1000 µg/mL PC-UCNPs/siRNA/HA. The data error bars indicate means  $\pm$  SD (n=4).
